# Supplementary figures and images for: Fucoidan present in brown algae induces apoptosis of human colon cancer cells
Source: Springer Nature journal article supplement (doi:10.1186/1471-230x-10-96), 2010-08-22

**A**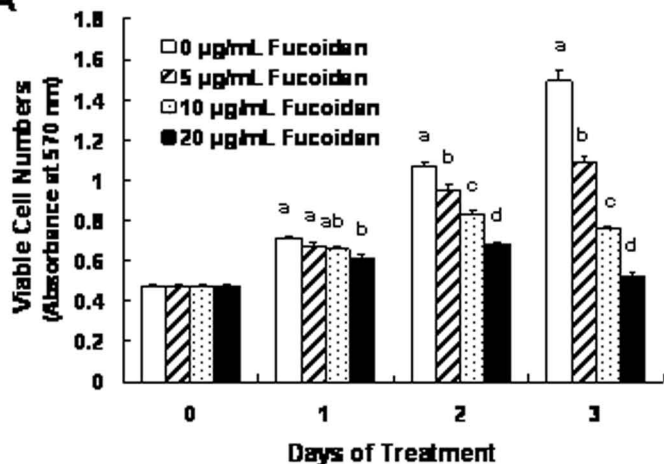**B**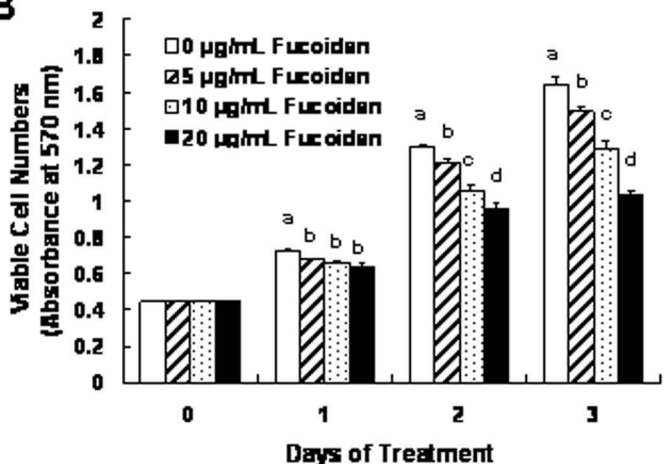**C**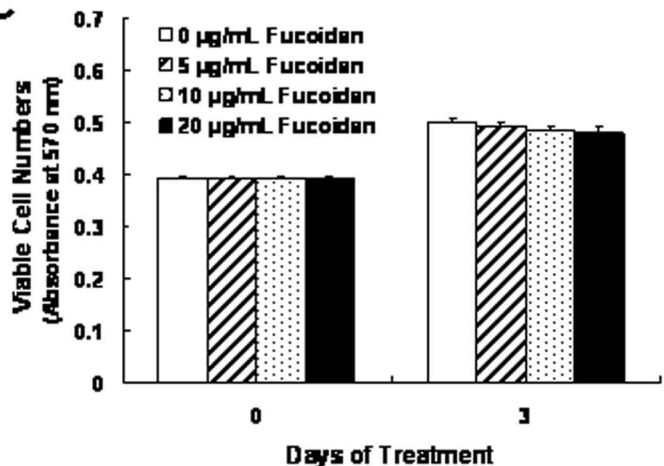

Supplement: 12876_2010_487_MOESM1_ESM.pdf [file 12876_2010_487_MOESM1_ESM.pdf]

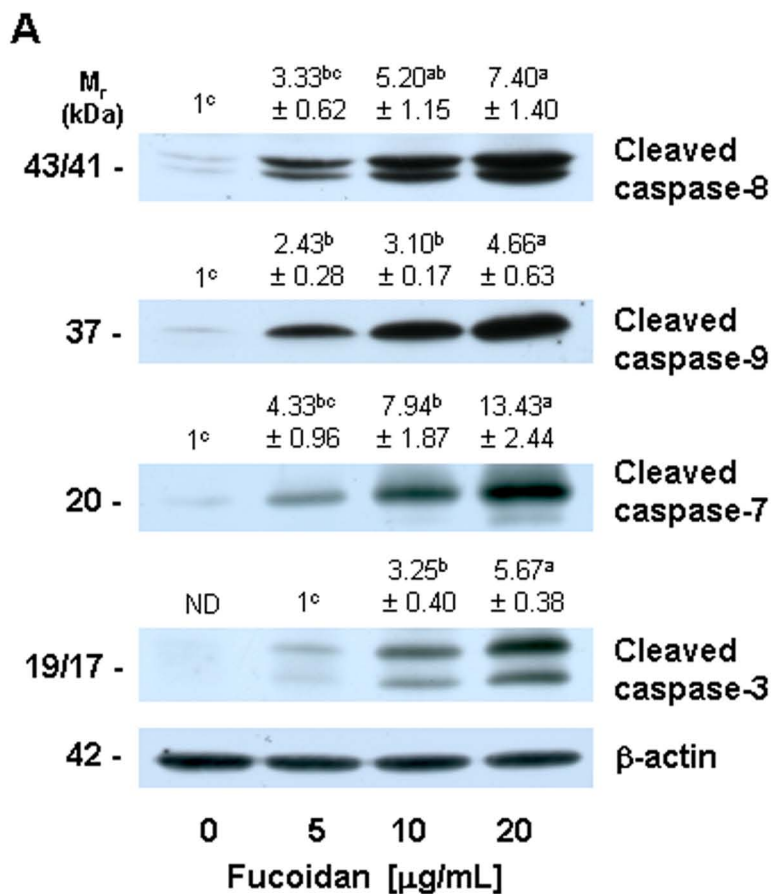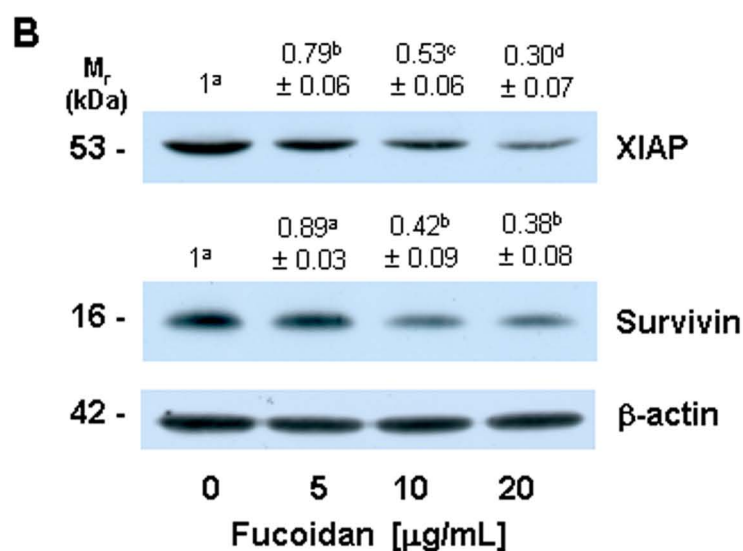

Supplement: 12876_2010_487_MOESM3_ESM.pdf [file 12876_2010_487_MOESM3_ESM.pdf]

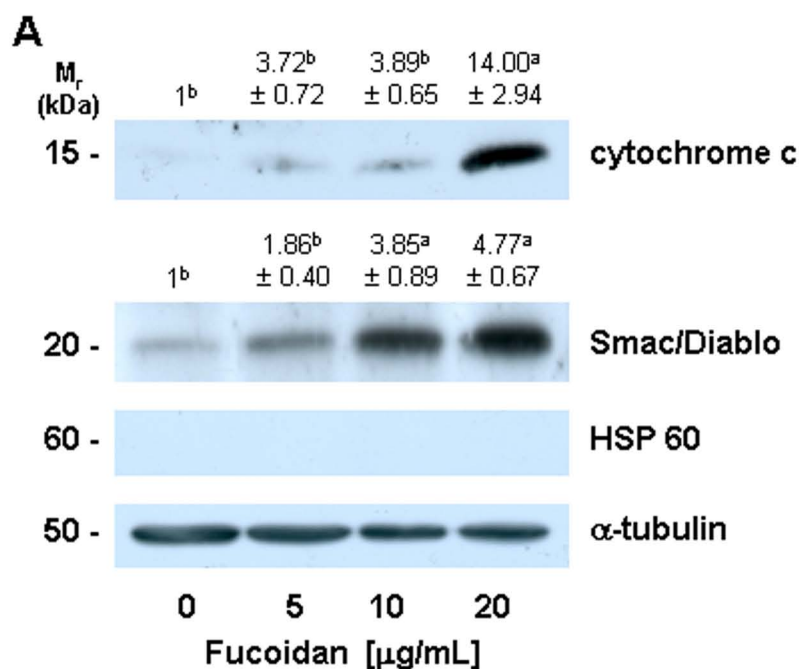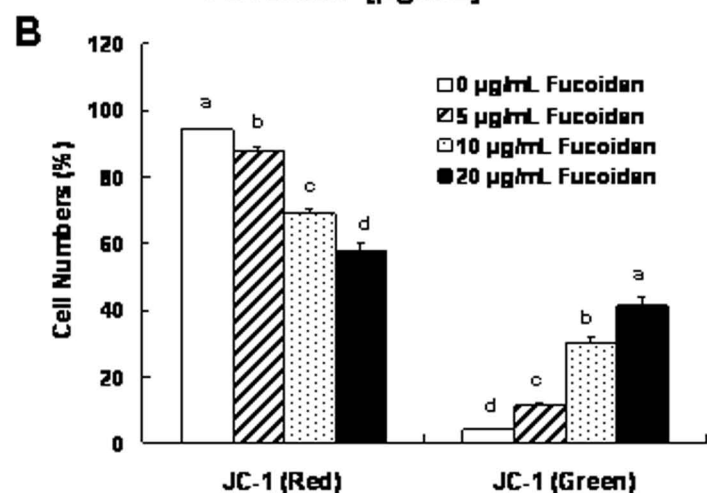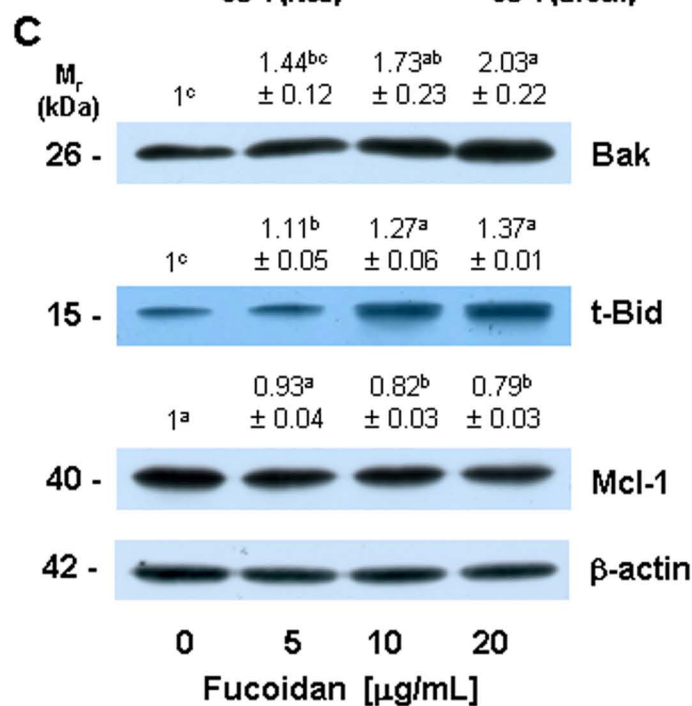

Supplement: 12876_2010_487_MOESM4_ESM.pdf [file 12876_2010_487_MOESM4_ESM.pdf]

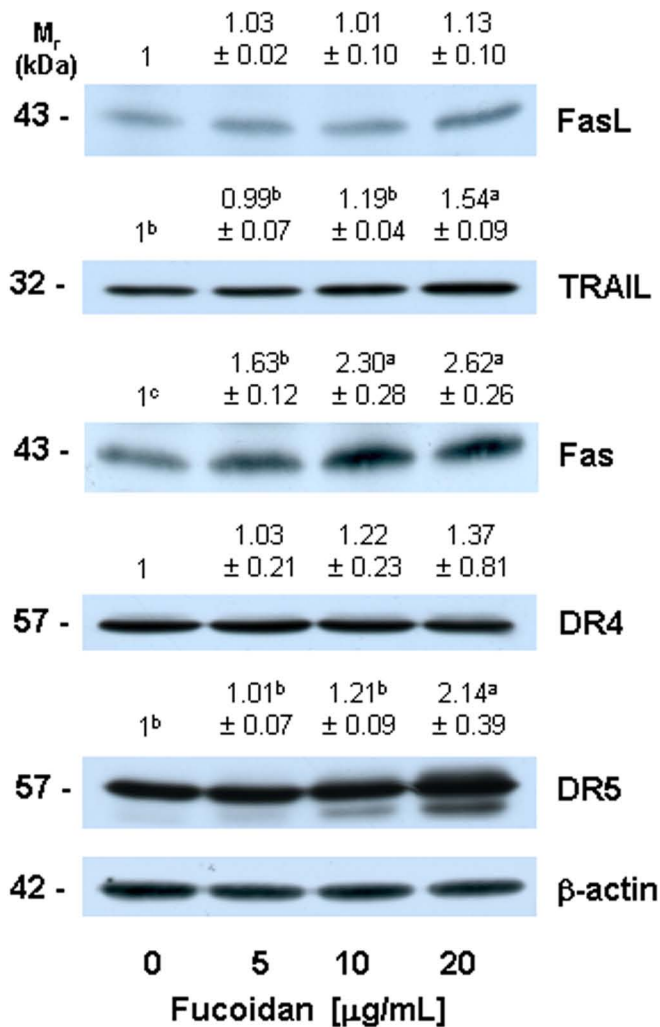

Supplement: 12876_2010_487_MOESM5_ESM.pdf [file 12876_2010_487_MOESM5_ESM.pdf]

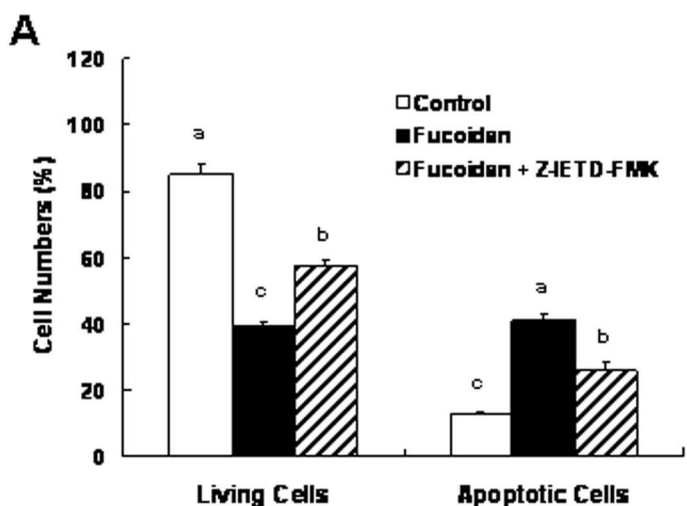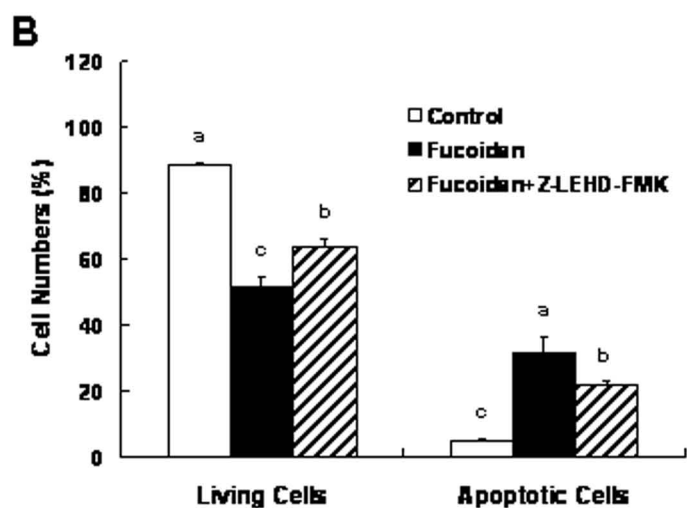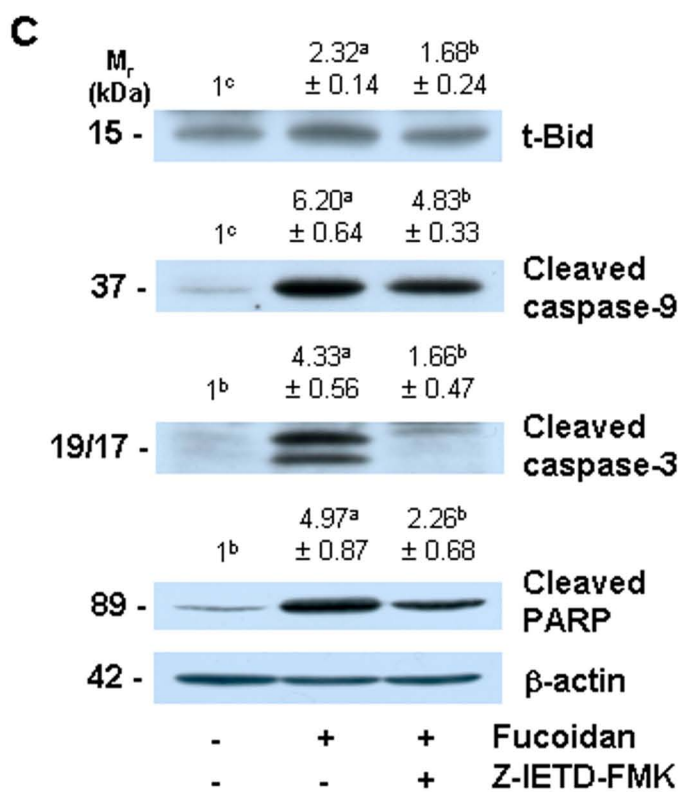

Supplement: 12876_2010_487_MOESM6_ESM.pdf [file 12876_2010_487_MOESM6_ESM.pdf]
